# Supplementary material for: A TNFR1–UBCH10 axis drives lung squamous cell carcinoma dedifferentiation and metastasis through a cell-autonomous signaling loop
Source: PubMed Central journal article supplement (PMC9587052; doi:10.1038/s41419-022-05308-4), 2022-10-21

Supplemental Figures for original western blots

Figure 1

Figure 1b:

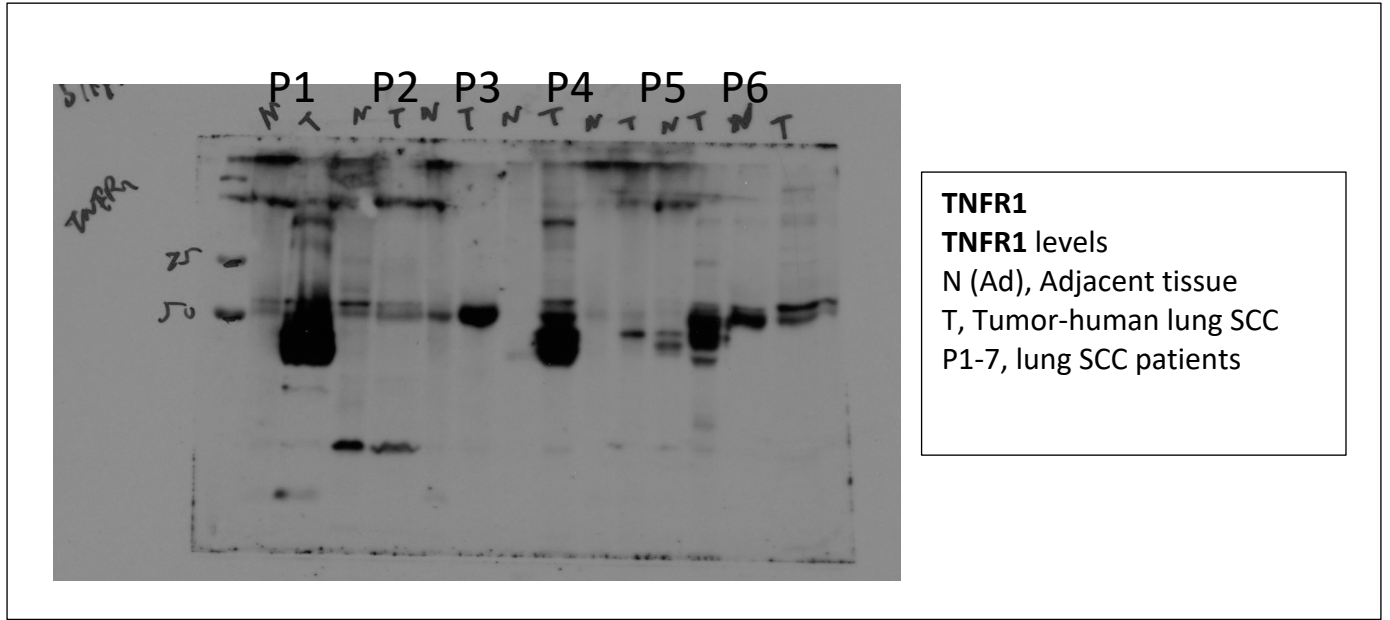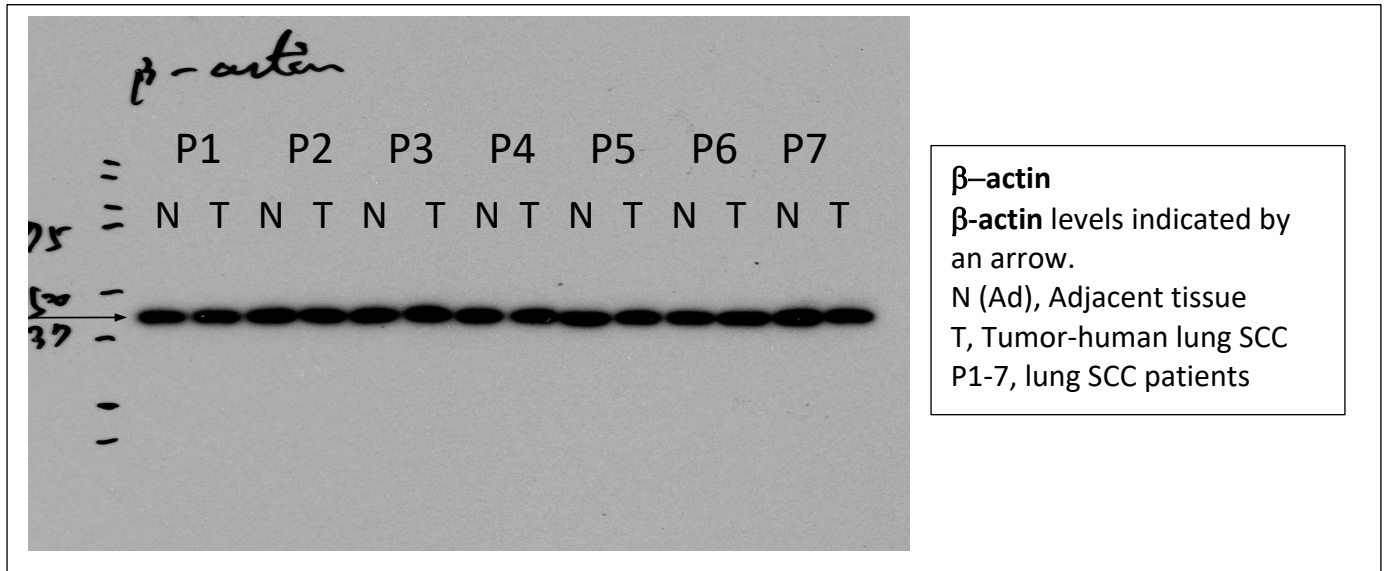

Figure 1e:

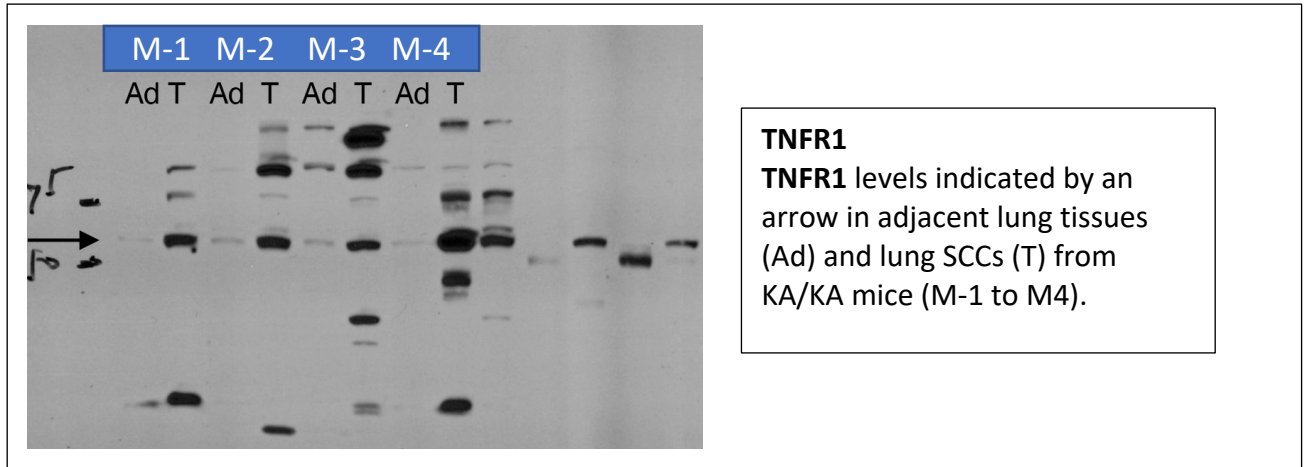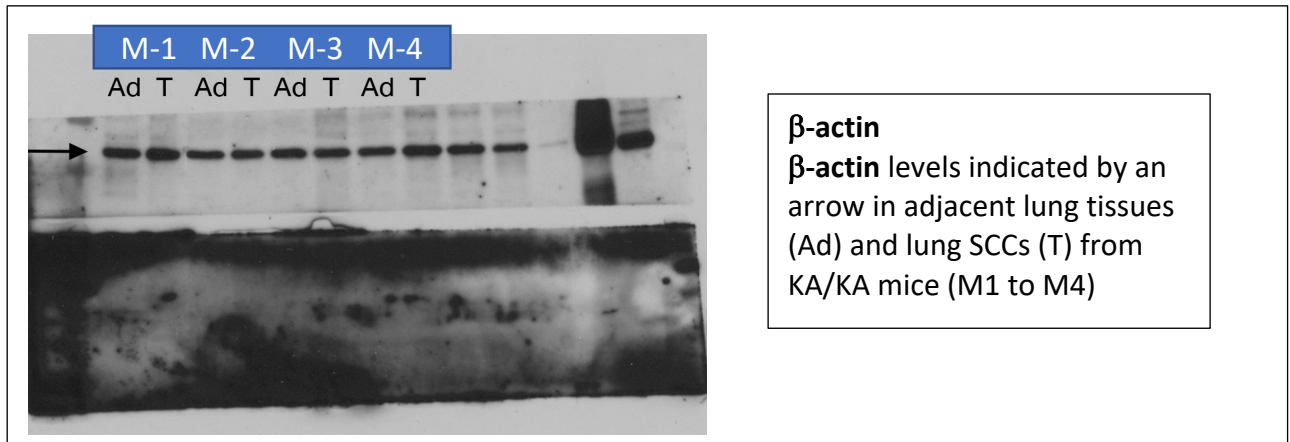

Figure 2

Figure 2a:

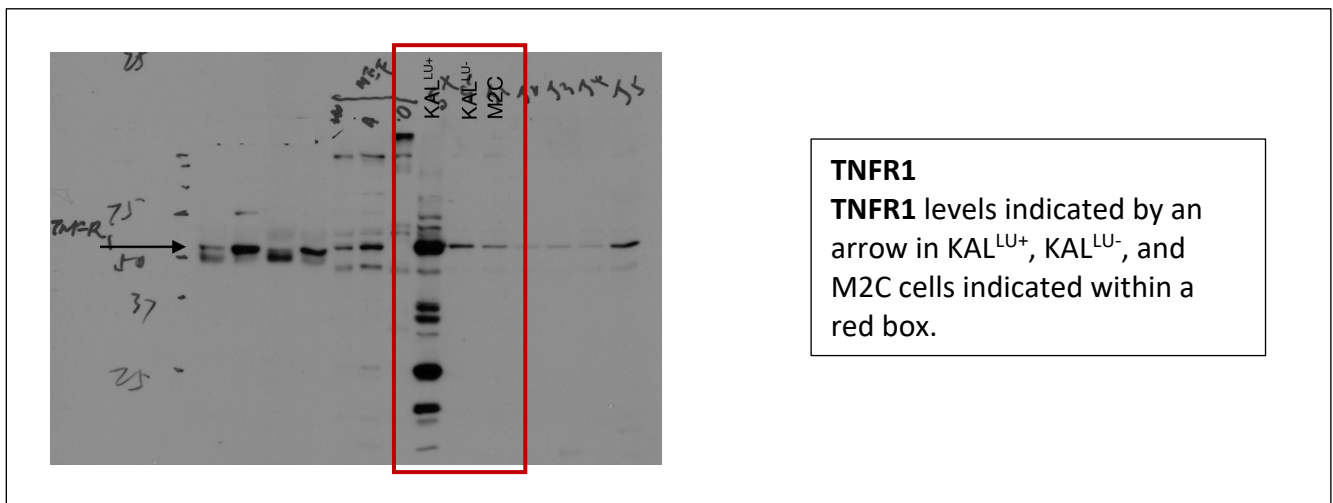

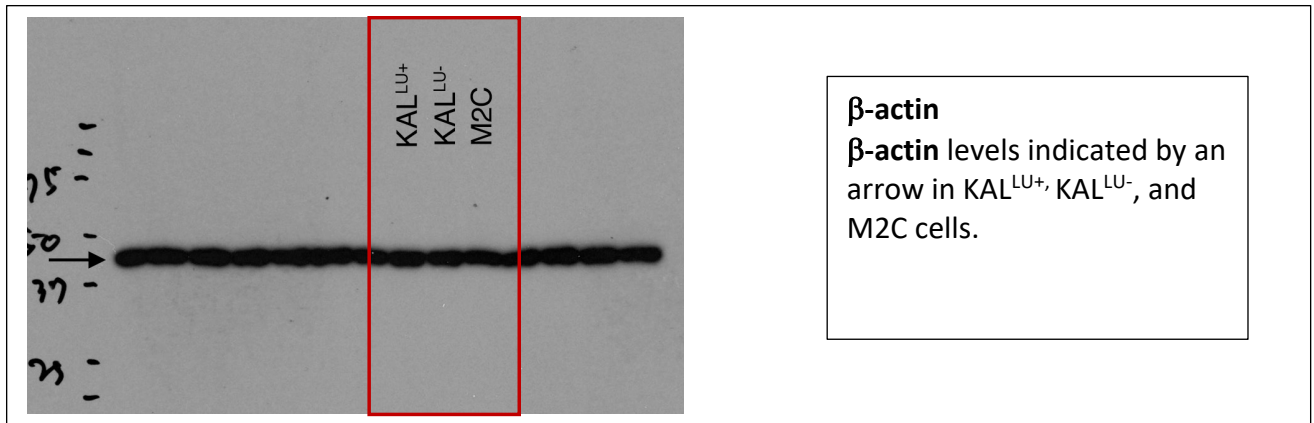

Figure 2c:

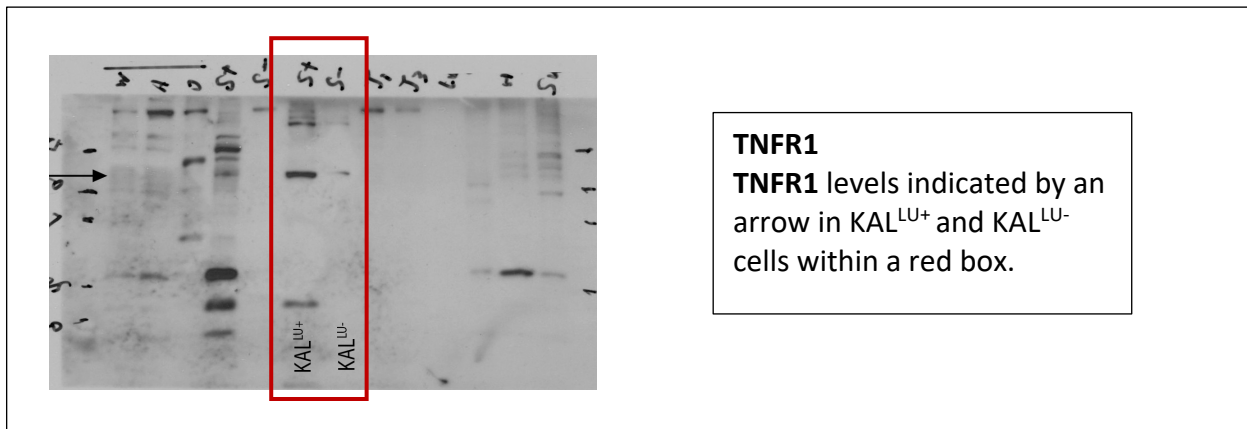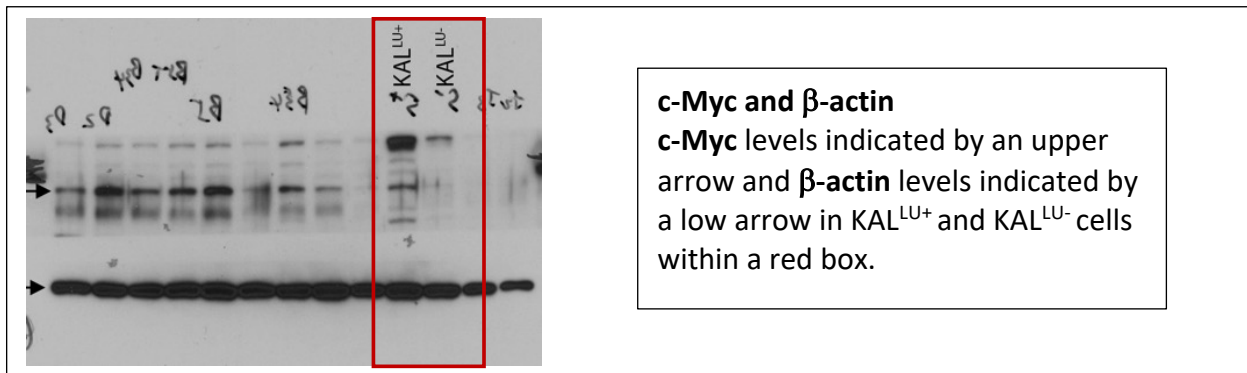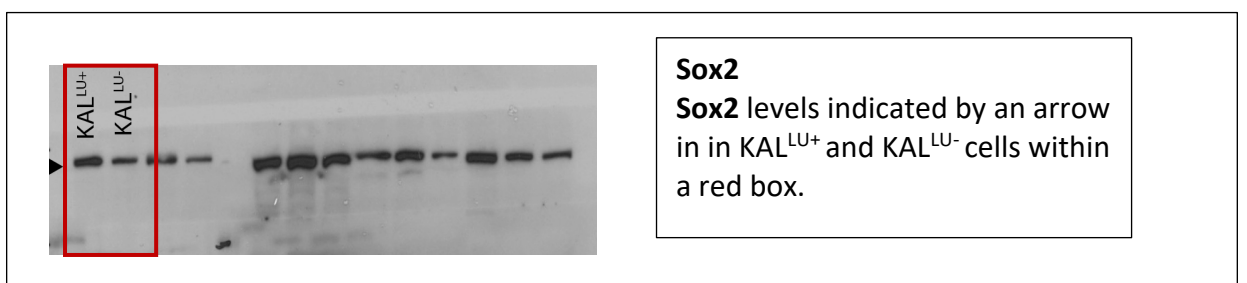

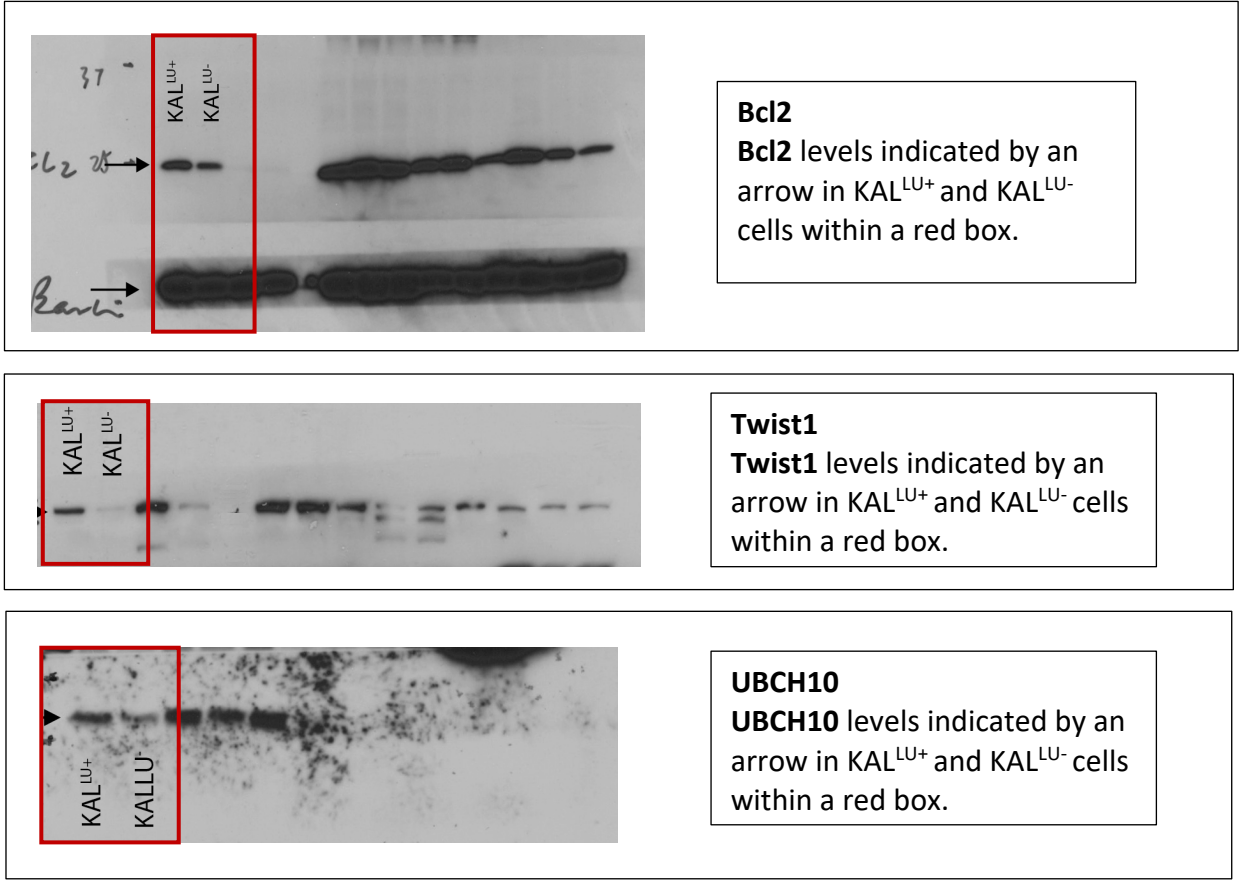

**Figure 3**

**Figure 3a:**

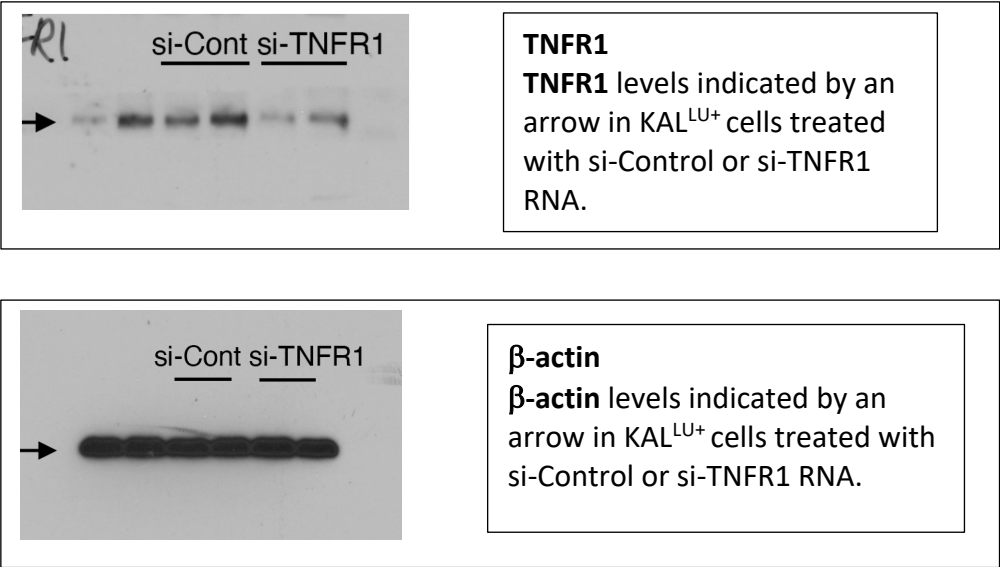

Figure 3c:

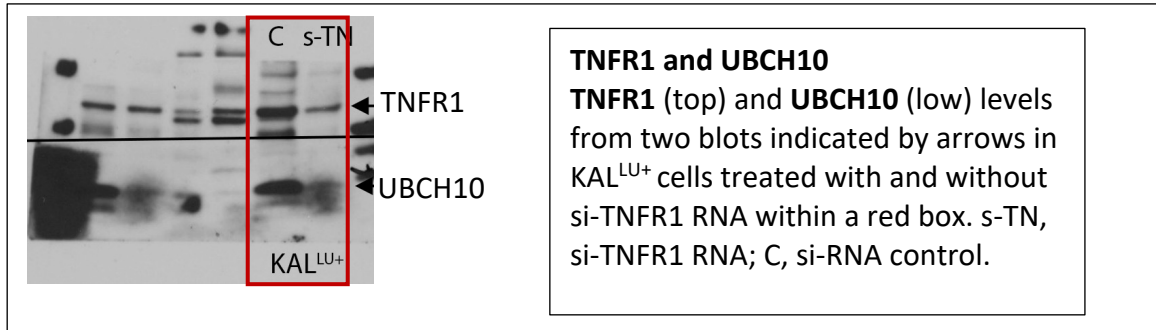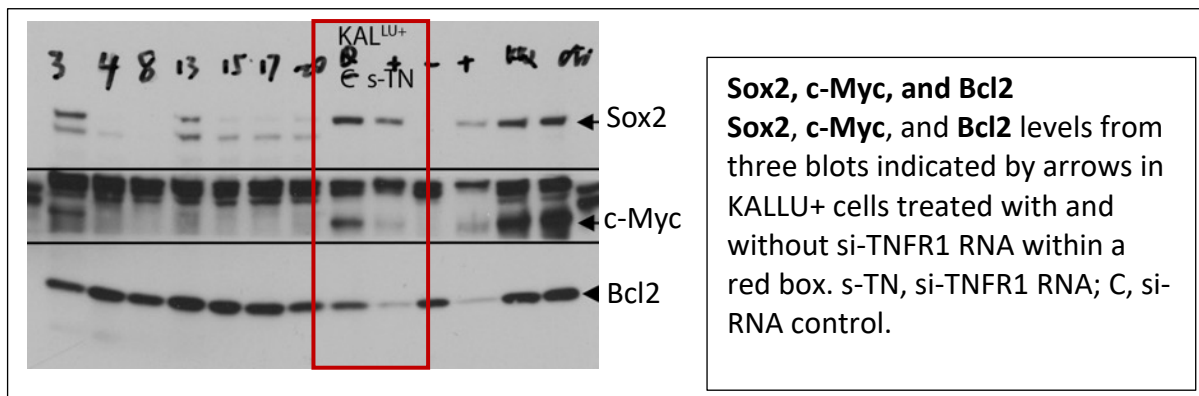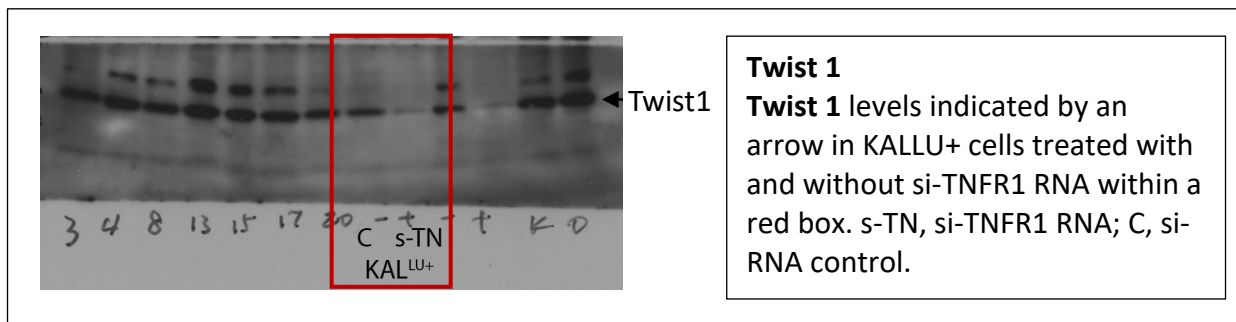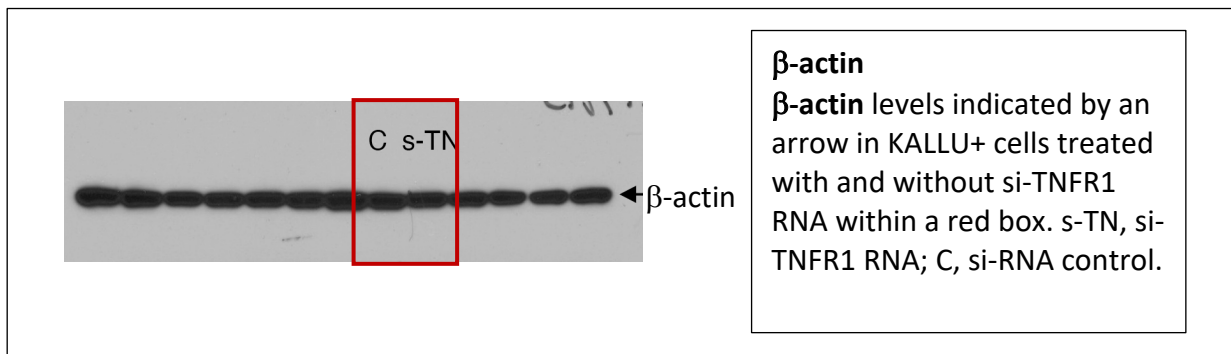

**Figure 3h:**

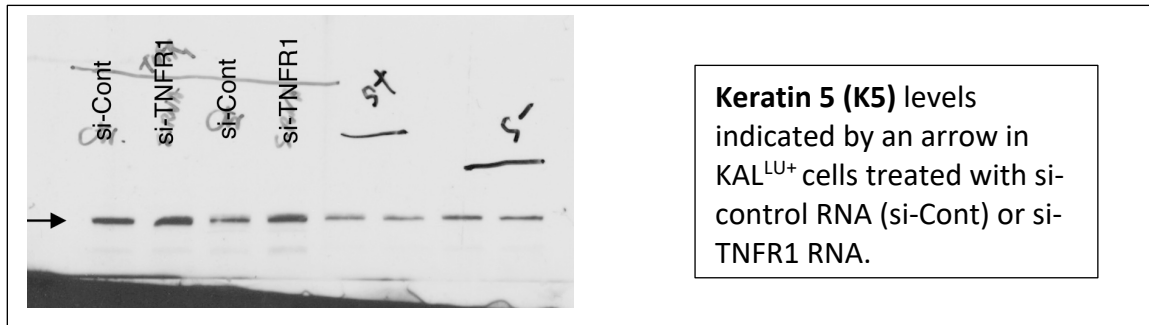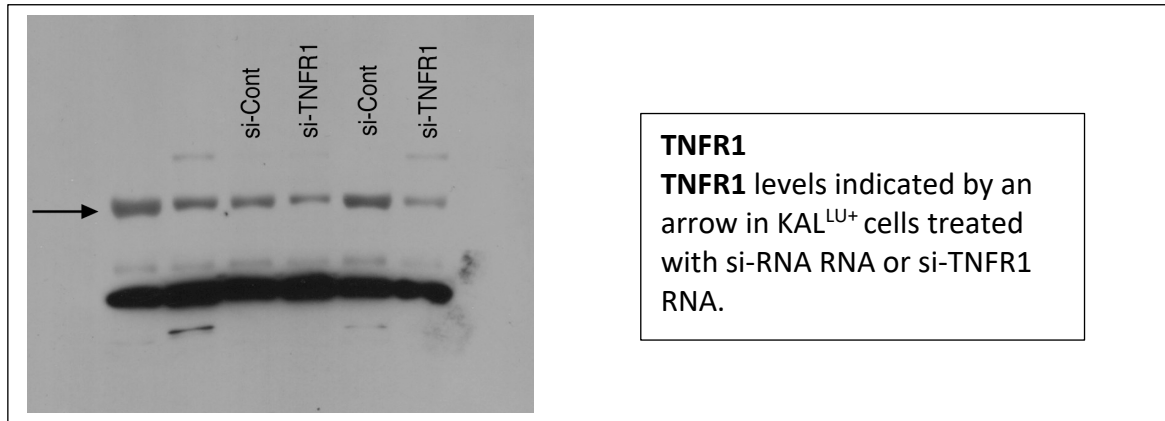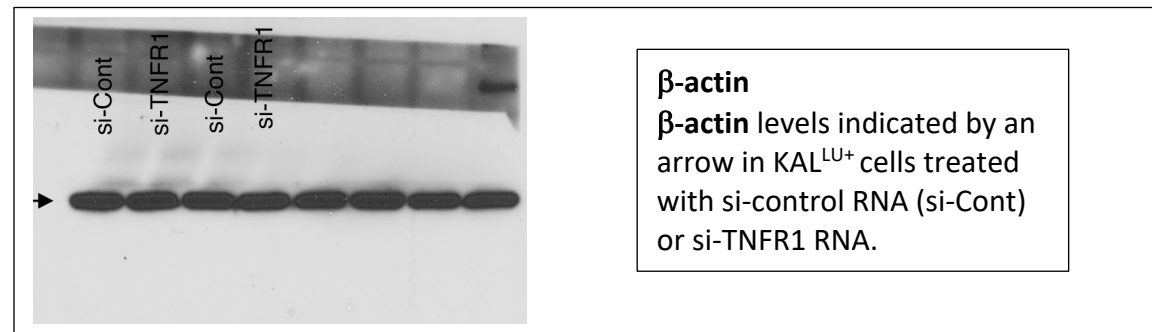

**Figure 4**

**Figure 4b:**

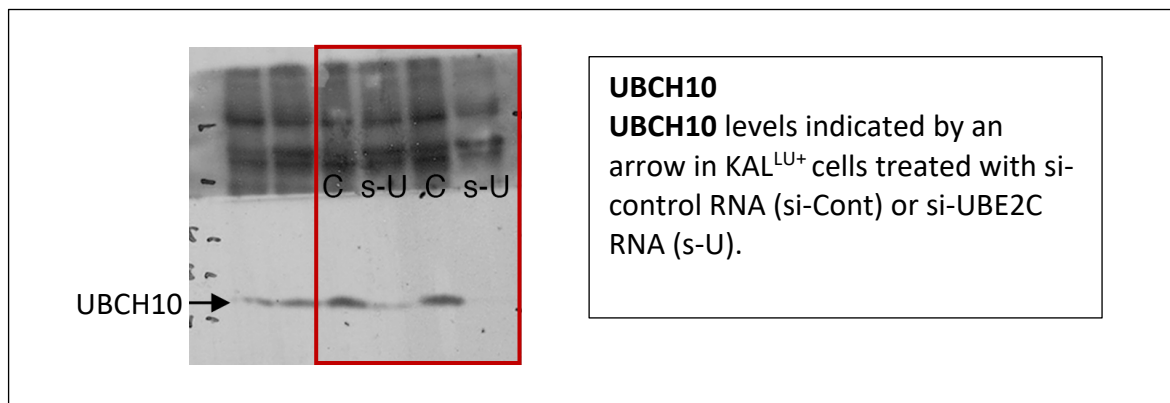

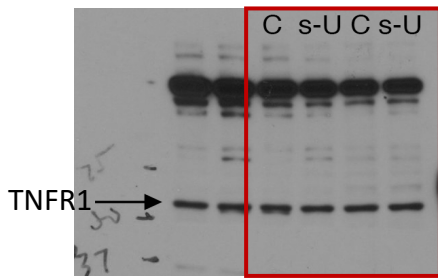

### TNFR1

TNFR1 levels indicated by an arrow in KAL<sup>LU+</sup> cells treated with si-control RNA (si-Cont) or si-UBE2C RNA (s-U).

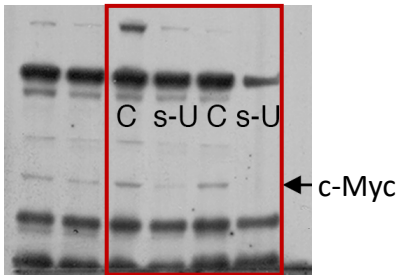

### c-Myc

c-Myc levels indicated by an arrow in KAL<sup>LU+</sup> cells treated with si-control RNA (si-Cont) or si-UBE2C RNA (s-U).

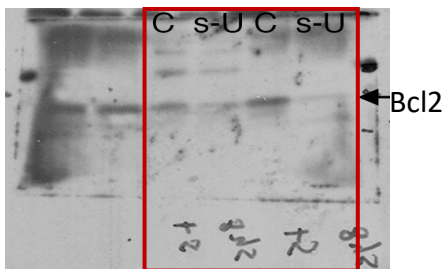

### Bcl2

Bcl2 levels indicated by an arrow in KAL<sup>LU+</sup> cells treated with si-control RNA (si-Cont) or si-UBE2C RNA (s-U).

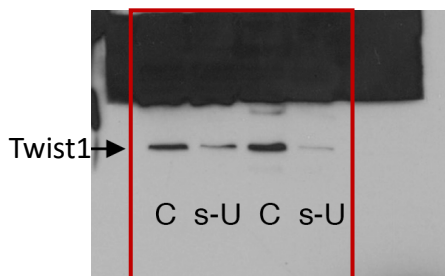

### Twist1

Twist1 levels indicated by an arrow in KAL<sup>LU+</sup> cells treated with si-control RNA (si-Cont) or si-UBE2C RNA (s-U).

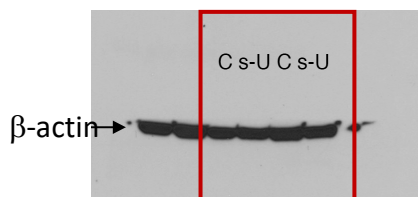

### $\beta$ -actin

$\beta$ -actin levels indicated by an arrow in KAL<sup>LU+</sup> cells treated with si-control RNA (si-Cont) or si-UBE2C RNA (s-U).

Figure 4b, right:

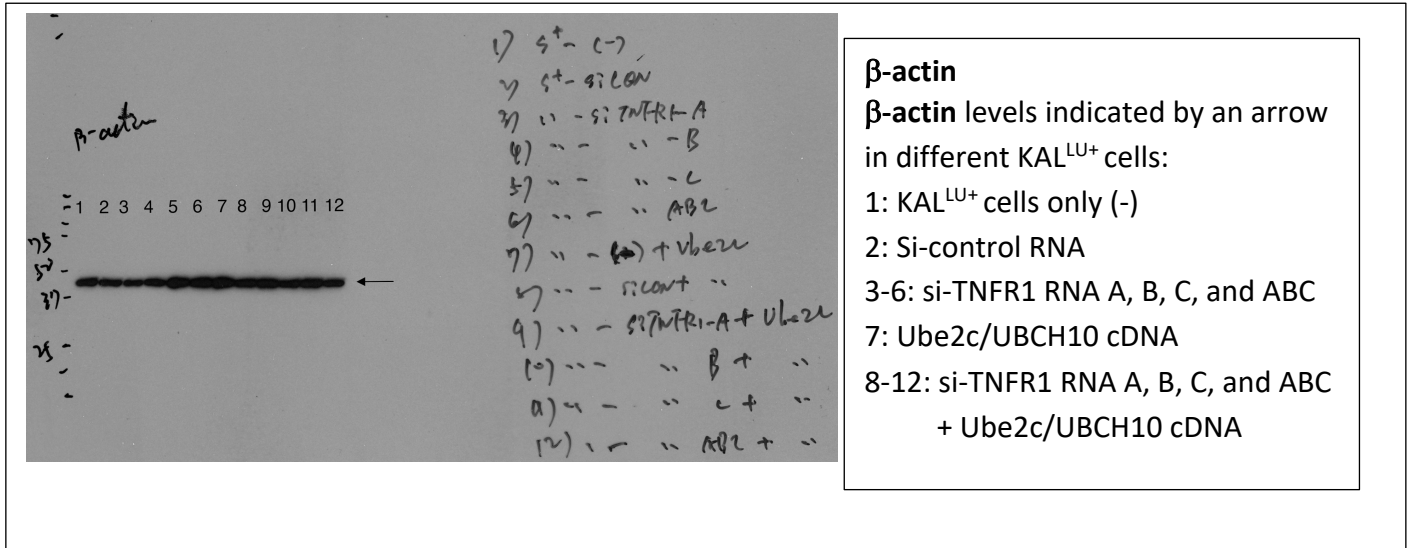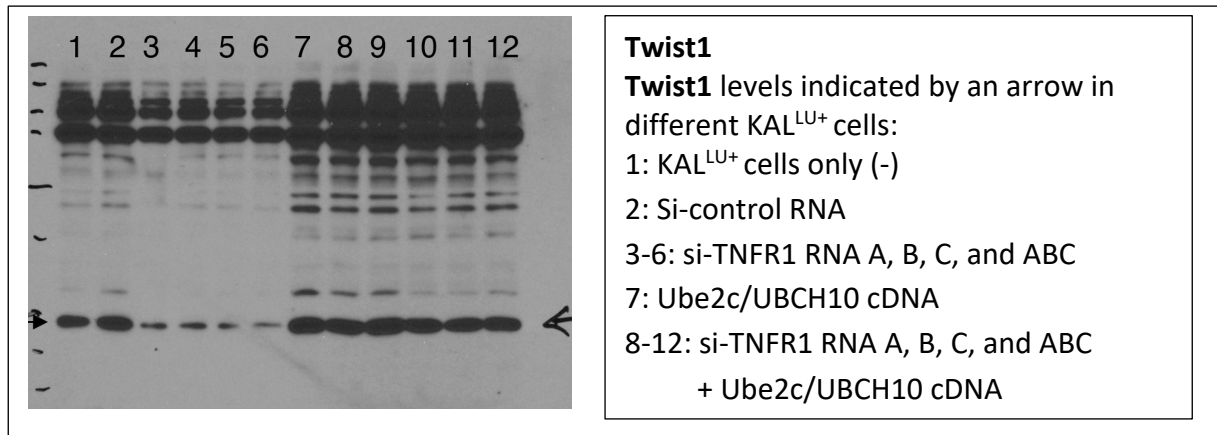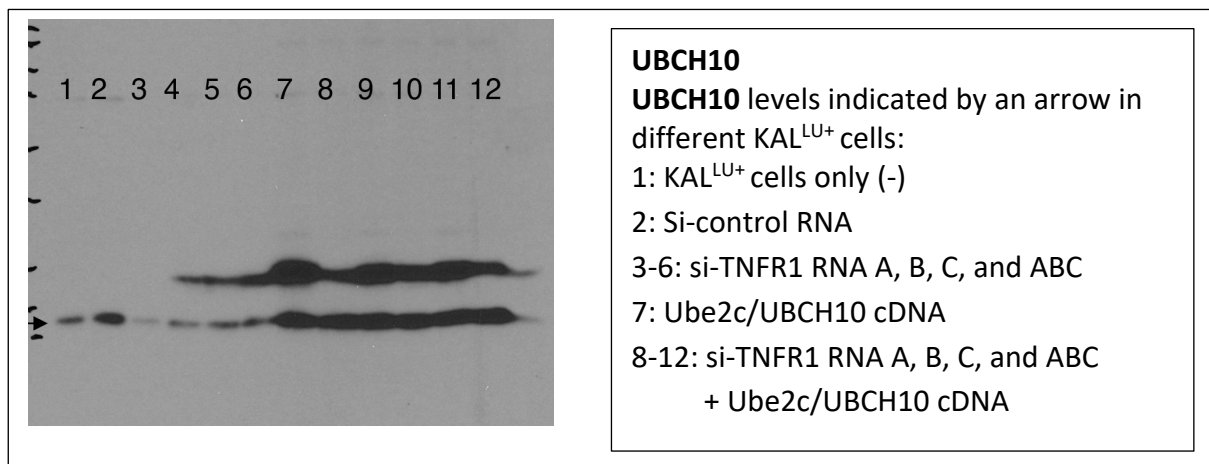



**Figure 4e:**

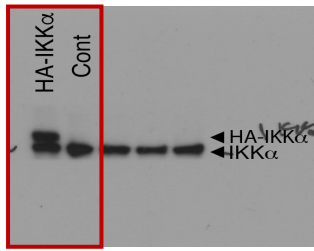

**HA-IKKα and IKKα**  
HA-IKKα and IKKα indicated by arrows in KAL<sup>LU+</sup> cells with and without HA-IKKα. Cont, Control.

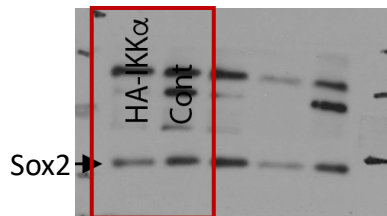

**Sox2**  
Sox2 levels indicated by an arrow in KAL<sup>LU+</sup> cells with and without HA-IKKα expression. Cont, Control.

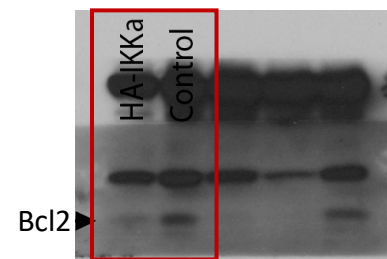

**Bcl2**  
Bcl2 levels indicated by an arrow in KAL<sup>LU+</sup> cells with and without overexpressed HA-IKKα.

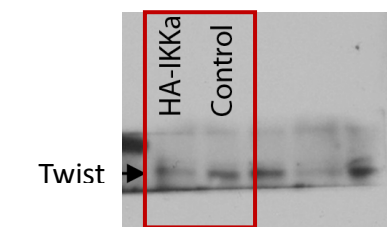

**Twist1**  
Twist1 levels indicated by an arrow in KAL<sup>LU+</sup> cells with and without HA-IKKα.

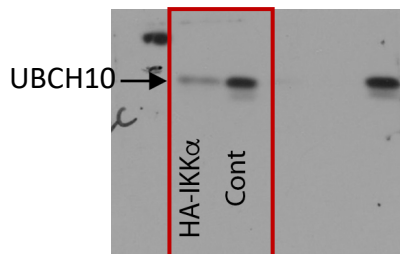

**UBCH10**  
UBCH10 levels indicated an arrow in KAL<sup>LU+</sup> cells with and without HA-IKKα. Cont, Control.

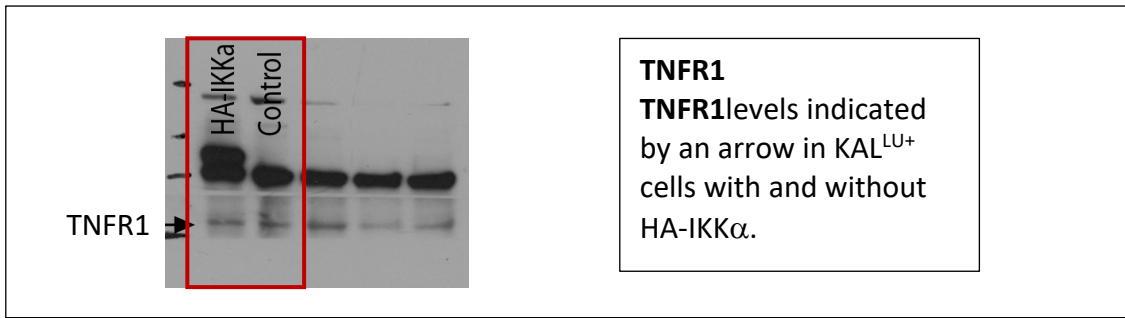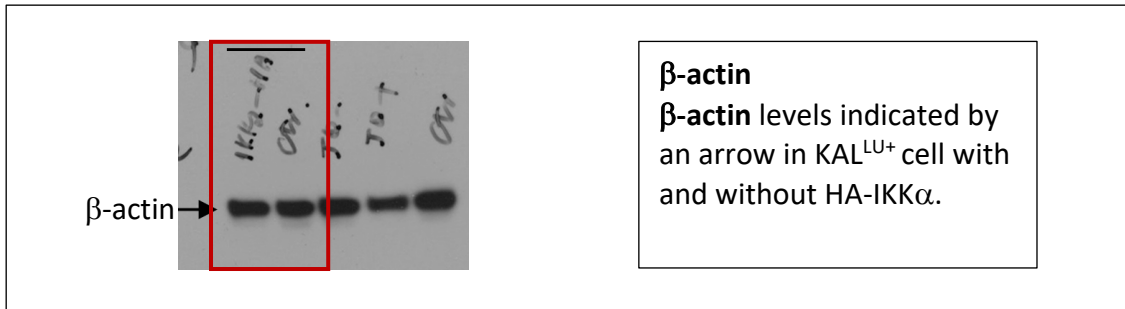

**Figure 5**

**Figure 5a:**

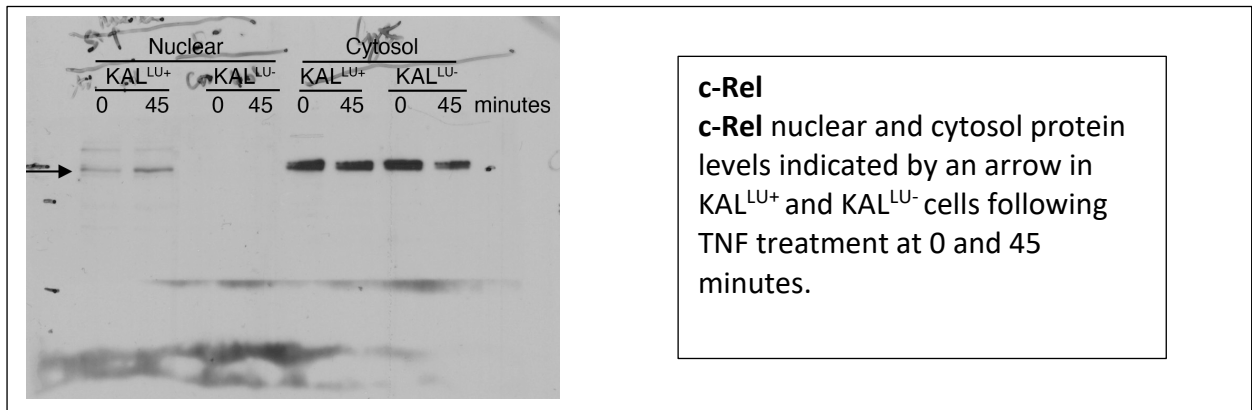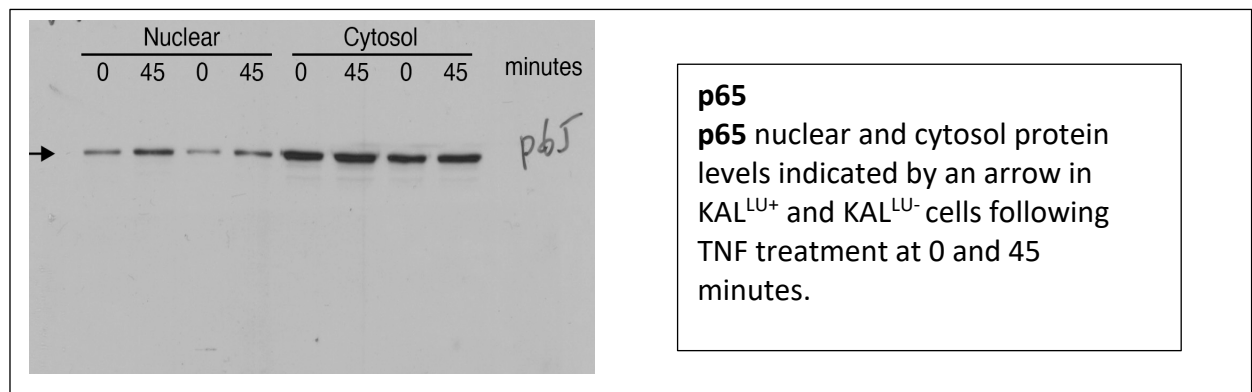

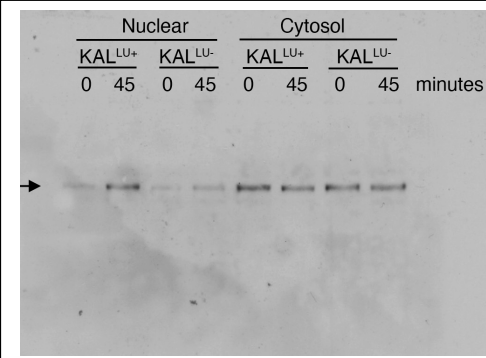

**p50**

**p50** nuclear and cytosol protein levels indicated by an arrow in KAL<sup>LU+</sup> and KAL<sup>LU-</sup> cells following TNF treatment at 0 and 45 minutes.

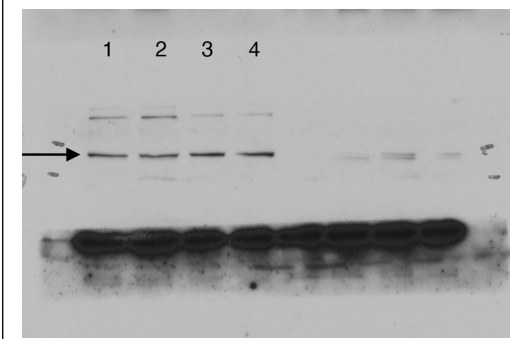

**Lamin B1**

**Lamin B1** levels indicated by an arrow as a nuclear protein loading control from number 1 to 4 in Figure 5a.

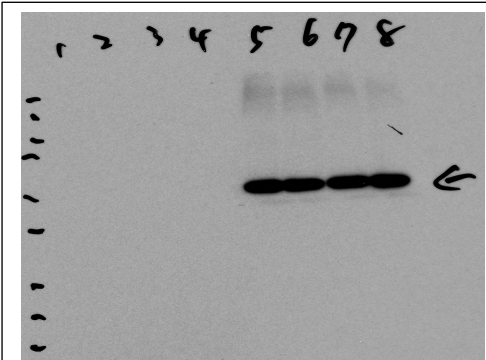

**α-Tubulin**

**α-Tubulin** cytosol protein levels indicated by an arrow, used as a cytosol protein loading control from number 5 to 8 in Figure 5a.

**Figure 5c:**

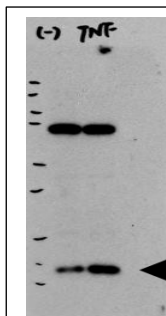

**UBCH10**

**UBCH10** levels indicated by an arrow in KAL<sup>LU+</sup> cells following TNF stimulation.

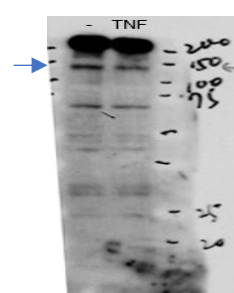

**E-cadherin**

**E-cadherin** levels indicated by an arrow in KAL<sup>LU+</sup> cells following TNF stimulation.

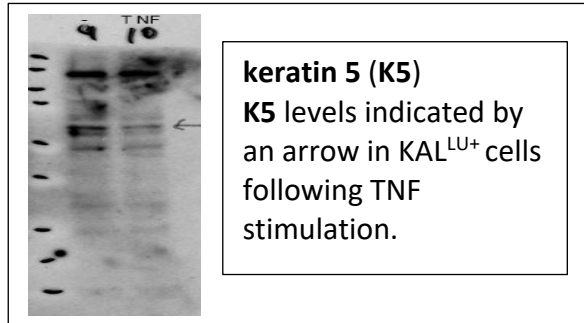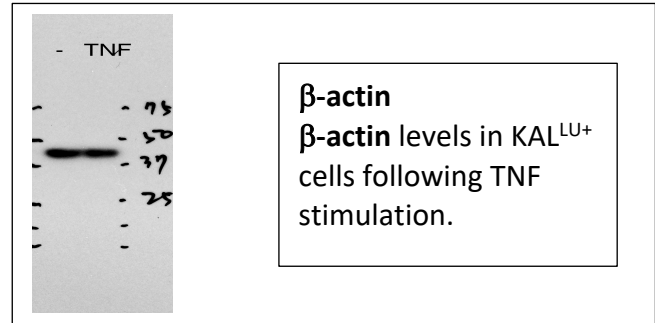

Figure 5e:

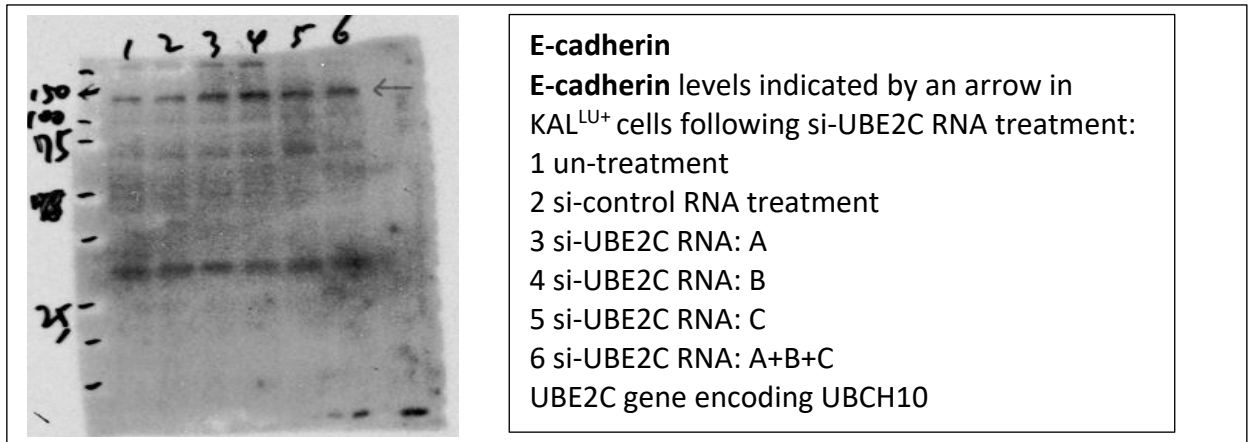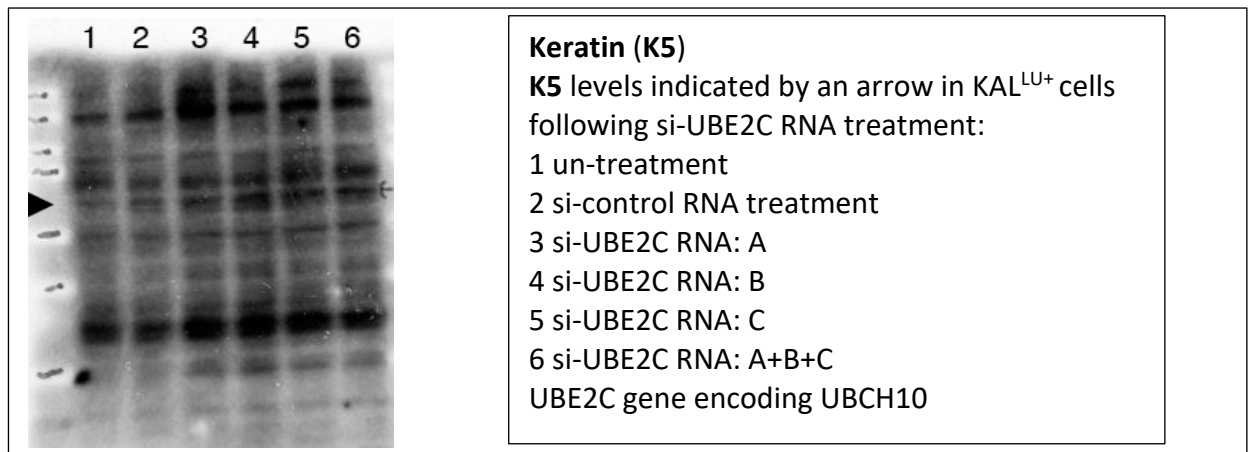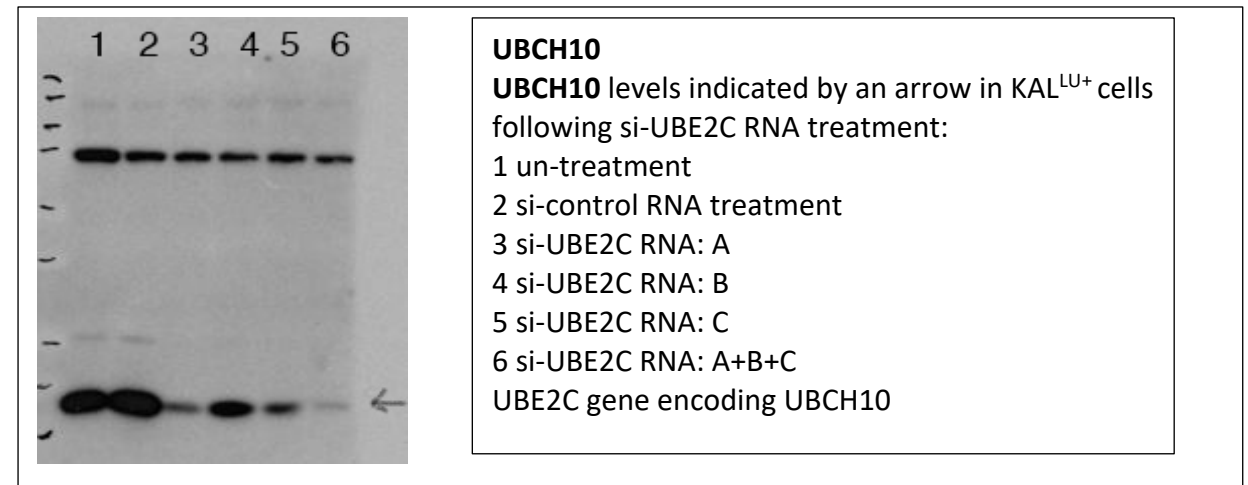

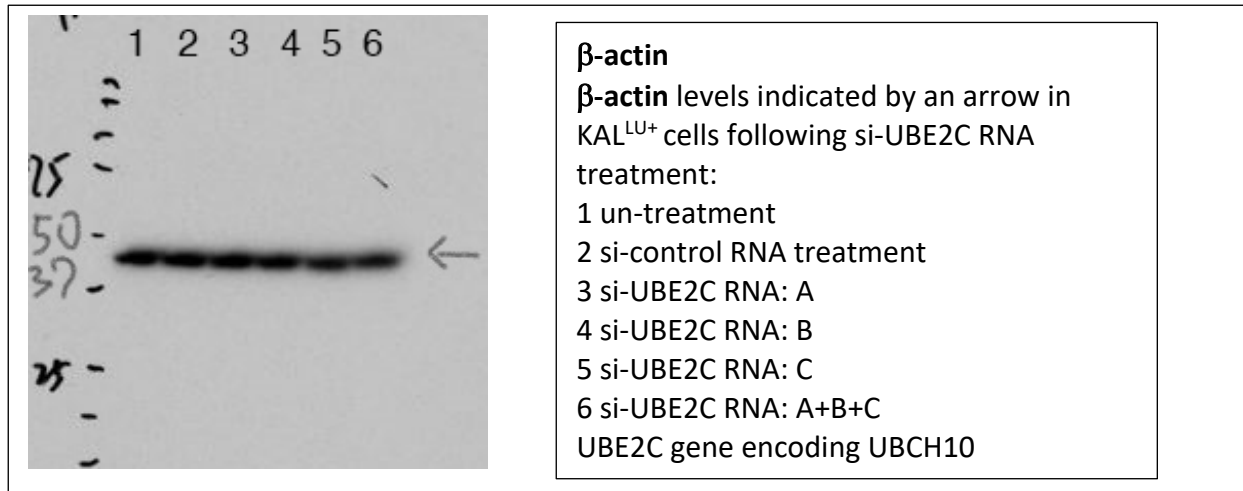

**Supplemental Figure 5**

**Figure S5b:**

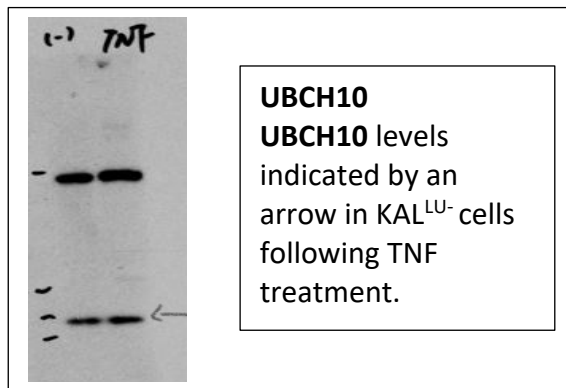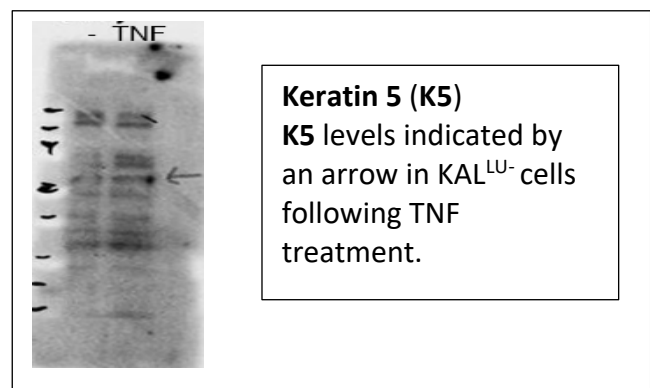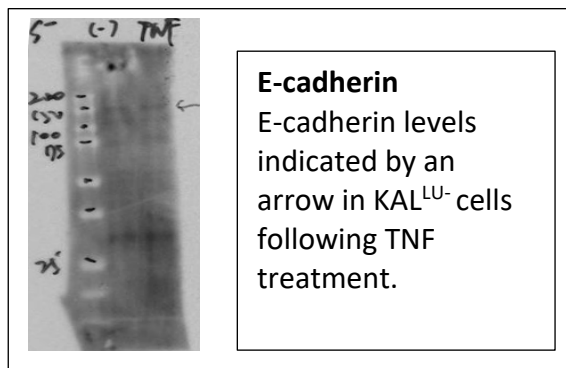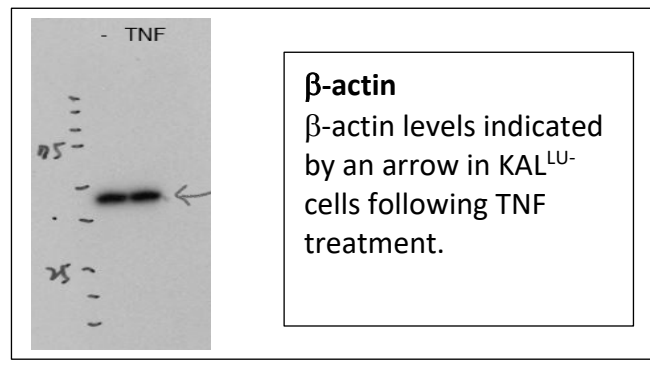

Supplement: 41419_2022_5308_MOESM2_ESM.pdf [file 41419_2022_5308_MOESM2_ESM.pdf]
