# Supplementary material for: A TNFR1–UBCH10 axis drives lung squamous cell carcinoma dedifferentiation and metastasis through a cell-autonomous signaling loop
Source: PubMed Central journal article supplement (PMC9587052; doi:10.1038/s41419-022-05308-4), 2022-10-21
Supplement: 41419_2022_5308_MOESM1_ESM.pdf [file 41419_2022_5308_MOESM1_ESM.pdf]

**A TNFR1–UBCH10 axis drives lung squamous cell carcinoma dedifferentiation and metastasis through a cell-autonomous signaling loop**

Zuoxiang Xiao, Gongping Shi, Sichuan Xi, Amit Kumar Singh, Jami Willette-Brown, Xin Li, Feng Zhu, Ling Su, Xiaolin Wu, David S. Schrupp, and Yinling Hu

**Supplemental Figures**

**Figure S1**

**Figure S2**

**Figure S3**

**Figure S4**

**Figure S5**

**Figure S1**

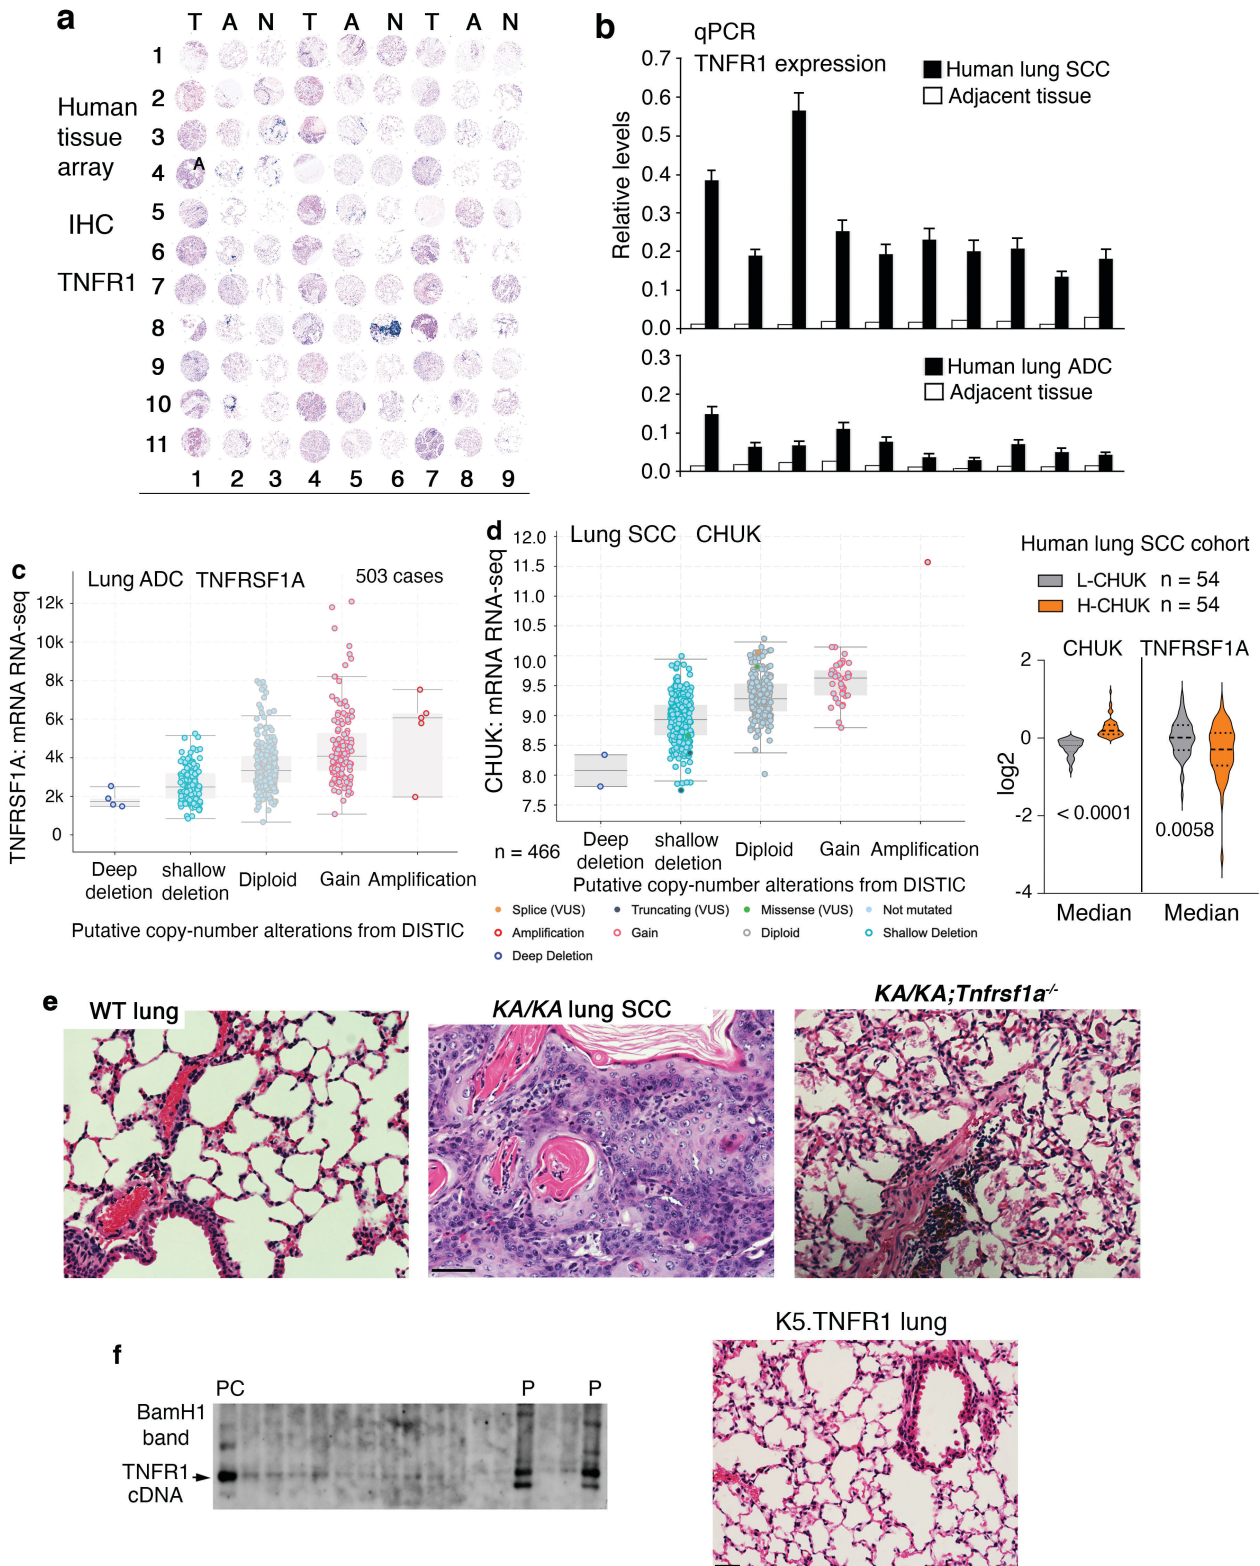

**Fig. S1: Overexpression of TNFRSF1A in human lung SCC.**

**a** Lung tissue array (BC04118, Biomax) stained with an anti-TNFR1 antibody. T, tumor; A, tissue adjacent to SCCs; N, normal lung tissue.

**b** RT-PCR analysis showing TNFR1 levels in human lung SCCs and their adjacent tissues.

**c** RNA-seq analyses showing *TNFRSF1A* expression in 507 human lung ADCs (TCGA, PanCancer, Atlas, cBioPortal).

**d** Left: RNA-seq analyses showing *CHUK* expression in 466 human lung SCCs (TCGA, PanCancer, Atlas, cBioPortal). Right: Correlation of high *CHUK* (H-*CHUK*) and low (L-*CHUK*), using median analysis to divide *CHUK* expression groups, with *TNFRSF1A* expression. Data were obtained from CPTAC, Cell 2021, cBioPortal. P values and sample numbers are indicated in the panel, Student's *t*-test.

**e** Hematoxylin and eosin (H&E) stained WT lung, *KA/KA* SCC, and *KA/KA;Tnfr1<sup>-/-</sup>* lung. Scale bar: 50  $\mu$ M.

**f** Left: Southern blot identifies the mouse TNFR1 cDNA in Tg-K5.TNFR1 transgenic mice, as digested with BamH1 enzyme and probed with mouse TNFR1 cDNA. The TNFR1 cDNA indicated by an arrow was used as a positive control. Right: H&E-stained lung section of 2-month-old Tg-K5.TNFR1 mouse. Scale bar: 30  $\mu$ M.

**Figure S2**

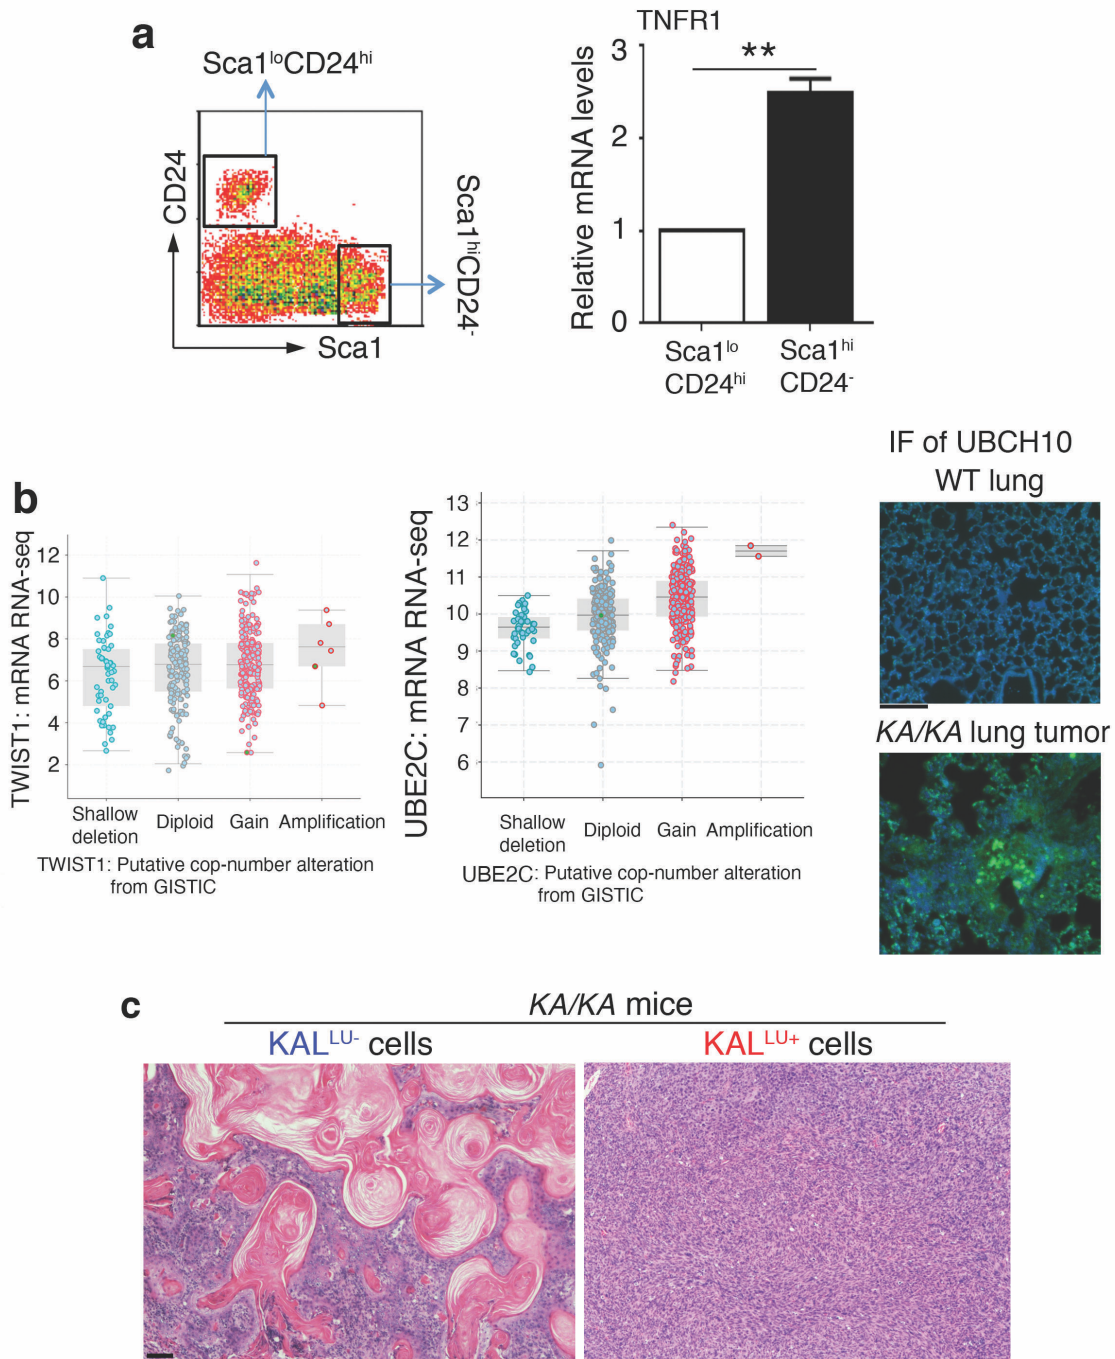

**Fig. S2: Elevated TNFR1 expression is associated with stemness and dedifferentiated spindle cell carcinoma.**

**a** KAL<sup>LU</sup> cells were cultured for several generations. Further isolation of the KAL<sup>LU+</sup> cells with Scd1 and CD24 markers (left panel), and examination of TNFR1 expression levels by RT-PCR (right panel). Mean  $\pm$  SD (three samples per group); \*\* $P < 0.01$ ; Student's *t*-test

**b** RNA-seq analyses showing TWIST1 (left) and UBE2C (middle) levels in a human lung SCC cohort containing 466 SCCs (TCGA, PanCancer, Atlas, cBioPortal). Immunofluorescent staining shows UBCH10 levels in lung SCC from *KA/KA* mice and WT lung (right). Green, positive for UBCH10; blue, DAPI nuclear staining. Scale bar: 40  $\mu$ M.

**c** H&E-stained tumor sections generated by KAL<sup>LU-</sup> and KAL<sup>LU+</sup> cell injections (see Figure 2f). Scale bar: 40  $\mu$ M.

**Figure S3**

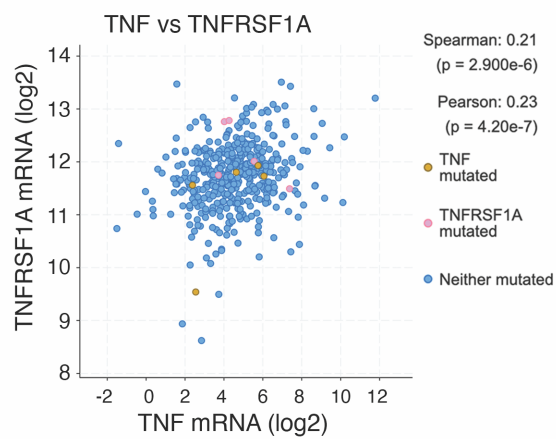

**Fig. S3: Correlation between TNFR1 and TNF in human lung SCC.**

Correlation between TNFRSF1A and TNF expression in a human lung SCC cohort containing 466 SCCs (TCGA, PanCancer Atlas, cBioPortal).

**Figure S4**

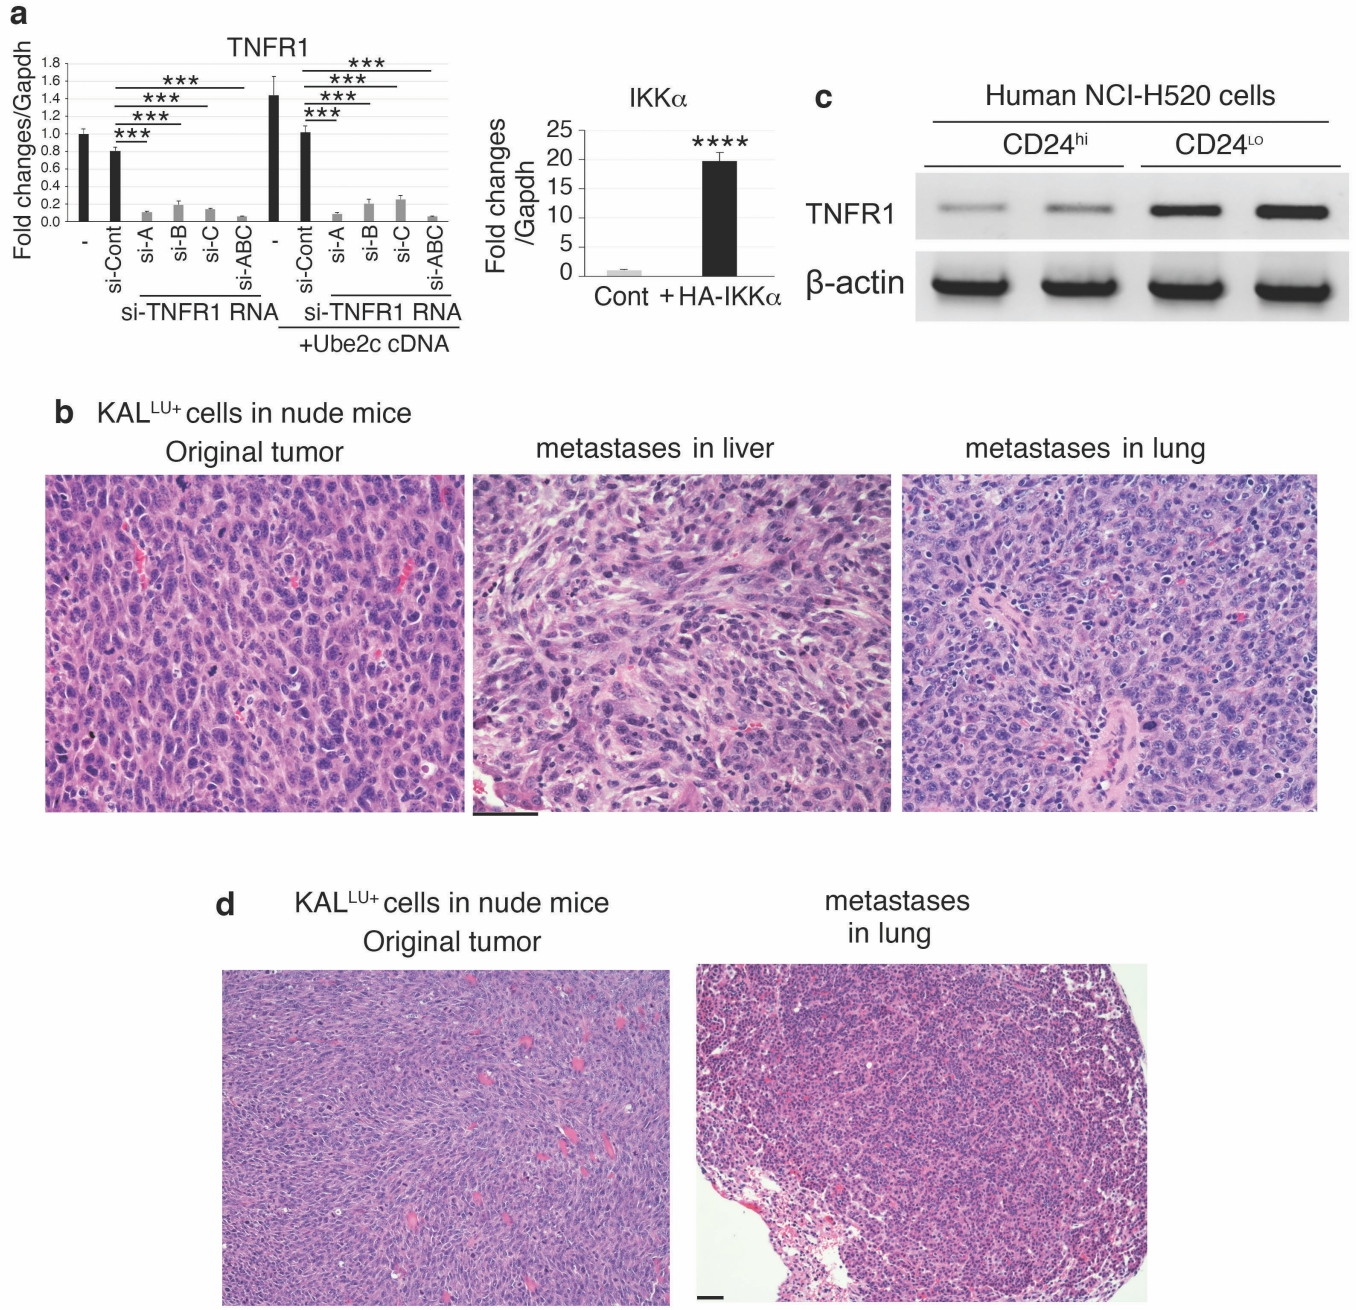

**Fig. S4: Elevated TNFR1 expression is associated with tumor metastasis in mice and stemness in human SCC cells.**

**a** Left: RT-PCR detects TNFR1 expression in KAL<sup>LU+</sup> (-), si-TNFR1 RNA-treated KAL<sup>LU+</sup> cells (si-TNFR1 RNA including si-A, si-B, si-C, and si-ABC), and si-TNFR1 RNA-treated KAL<sup>LU+</sup> cells with reintroduced Ube2c/UBCH10 cDNA. Mean  $\pm$  SD (four samples per group); \*\*\* $P < 0.001$ ; Student's *t*-test. Right: RT-PCR detects IKK $\alpha$  expression in KAL<sup>LU+</sup> cells with introduced vector DNA (Cont) and HA-IKK $\alpha$  cDNA). Mean  $\pm$  SD (three samples per group); \*\*\*\* $P < 0.0001$ ; Student's *t*-test.

**b** H&E-stained metastases in the liver and lung and the original lung tumor derived from KAL<sup>LU+</sup> cell ( $5 \times 10^5$  cells per mouse) injection. Scale bar: 40  $\mu$ M.

**c** RT-PCR showing TNFR1 expression levels in isolated CD24<sup>hi</sup> and CD24<sup>lo</sup> cells from H520 cells. These cells were CD44-positive.  $\beta$ -actin is a mRNA loading control.

**d** H&E-stained original tumors derived from human NCI-H520 cell injection and metastases in lungs (see Fig. 4I). Scale bar: 40  $\mu$ M.



**Figure S5**

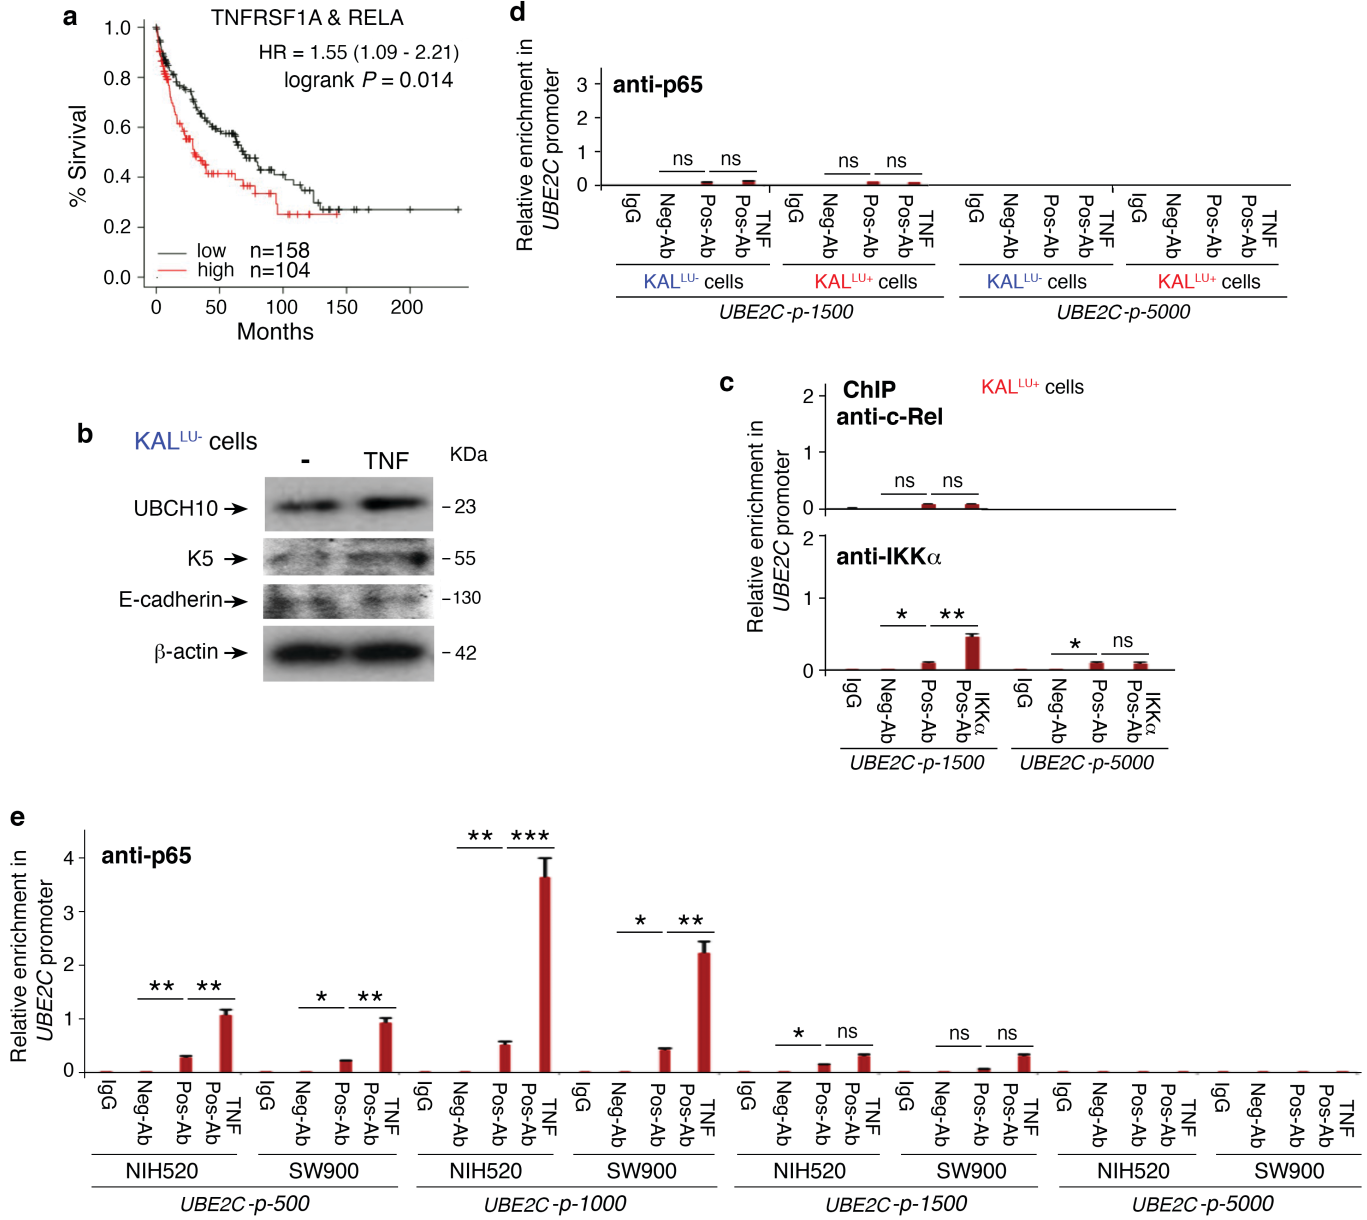

**Fig. S5: Regulation of expression of the *UBE2C* gene at a transcriptional level.**

**a** Survival curves of human lung SCC expressing double-high TNFRSF1A and RELA levels compared to low TNFRSF1A levels. The data were obtained from the Kaplan-Meier plotter.

**b** Immunoblotting showing indicated protein levels in KAL<sup>LU-</sup> cells following TNF (10 ng/mL) for 60 minutes.  $\beta$ -actin, a protein loading control.

**c** ChIP assay shows the relative enrichments of c-Rel and IKK $\alpha$  on the *Ube2c* promoter (p), with antibodies against c-Rel and IKK $\alpha$  for immunoprecipitation and with PCR primers for the *Ube2c* promoter at regions upstream of -1,500 bp and -5,000 bp in KAL<sup>LU+</sup> cells. The relative enrichments were compared to input levels. anti- or Ab, antibody; Neg-Ab, negative-control antibody (Ig); Pos-Ab, positive experimental antibody; +IKK $\alpha$ , overexpressed HA-IKK $\alpha$  in KAL<sup>LU+</sup> cells. Mean  $\pm$  SD (three samples per group); \* $P$  < 0.05; \*\* $P$  < 0.01; ns, not significant; Student's *t*-test.

**d** ChIP assay shows the relative enrichment of p65 with the *Ube2c* promoter (p), with anti-p65 antibody for immunoprecipitation, and with PCR primers for the *Ube2c* promoter at regions upstream of -1,500 bp and -5,000 bp in KAL<sup>LU-</sup> and KAL<sup>LU+</sup> cells. The relative enrichment was compared to input levels. anti- or Ab, antibody; Neg-Ab, negative-control antibody (Ig); Pos-Ab, positive experimental antibody; TNF, TNF (10 ng/mL) treatment for 45 minutes. Mean  $\pm$  SD (three samples per group); ns, not significant; Student's *t*-test.

**e** ChIP assay shows the enrichment of p65 with the *Ube2c* promoter (p), with anti-p65 antibody for immunoprecipitation, and with PCR primers for the *Ube2c* promoter at regions upstream of -500 bp, -1,000 bp, -1,500 bp, and -5,000 bp in human H520 and SW900 cells. The relative enrichments were compared to input levels. anti-, antibody; Neg-Ab, negative control antibody; Pos-Ab, positive experimental antibody; TNF, TNF (10 ng/mL) treatment for 45 minutes. Mean  $\pm$  SD (three samples per group); \* $P$  < 0.05; \*\* $P$  < 0.01; \*\*\* $P$  < 0.001; ns, not significant; Student's *t*-test.
